# Supplementary material for: CCN estimations at a high-altitude remote site: role of organic aerosol variability and hygroscopicity
Source: Copernicus journal article supplement (doi:10.5194/acp-24-13865-2024), 2024-12-16
Supplement: Supplementary file 1 [file acp-24-13865-2024-supplement.pdf]

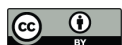

*Supplement of*

## **CCN estimations at a high-altitude remote site: role of organic aerosol variability and hygroscopicity**

**Fernando Rejano et al.**

*Correspondence to:* Fernando Rejano (frejano@ugr.es)

The copyright of individual parts of the supplement might differ from the article licence.

| Species  | $NH_4NO_3$ | $(NH_4)_2SO_4$ | $(NH_4)HSO_4$ | $H_2SO_4$ | eBC  |
|----------|------------|----------------|---------------|-----------|------|
| $\rho$   | 1.72       | 1.77           | 1.78          | 1.83      | 1.70 |
| $\kappa$ | 0.58       | 0.56           | 0.48          | 0.9       | 0    |

**Table S1. Densities ( $\rho$ ) and hygroscopicity parameters ( $\kappa$ ) used in this study for inorganic species and eBC. These values are taken from Wu et al. (2016). The density and hygroscopicity for sulfuric acid are taken from Gysel et al. (2007) and Petters and Kreidenweis (2007), respectively.**

| Parameter                |       | Mean | Median | STD  | P 25 | P 75 |
|--------------------------|-------|------|--------|------|------|------|
| $N_{tot}$ ( $cm^{-3}$ )  |       | 2409 | 1488   | 2370 | 636  | 3358 |
| $N_{nucl}$ ( $cm^{-3}$ ) |       | 768  | 282    | 1192 | 113  | 831  |
| $N_{ait}$ ( $cm^{-3}$ )  |       | 1215 | 767    | 1139 | 326  | 1801 |
| $N_{acc}$ ( $cm^{-3}$ )  |       | 454  | 359    | 368  | 163  | 670  |
| $N_{CCN}$ ( $cm^{-3}$ )  | 0.20% | 321  | 276    | 216  | 145  | 465  |
|                          | 0.40% | 638  | 563    | 423  | 282  | 913  |
|                          | 0.60% | 813  | 713    | 531  | 359  | 1160 |
| $D_{crit}$ (nm)          | 0.20% | 111  | 109    | 21   | 95   | 126  |
|                          | 0.40% | 72   | 74     | 18   | 60   | 82   |
|                          | 0.60% | 58   | 60     | 16   | 46   | 66   |
| $\kappa$ (-)             | 0.20% | 0.22 | 0.18   | 0.12 | 0.13 | 0.25 |
|                          | 0.40% | 0.22 | 0.15   | 0.17 | 0.11 | 0.25 |
|                          | 0.60% | 0.20 | 0.13   | 0.19 | 0.09 | 0.24 |

**Table S2. Statistical overview (mean, median, standard deviation, and percentiles 25 and 75) of physical parameters and activation properties at SS=0.2, 0.4 and 0.6 %.**

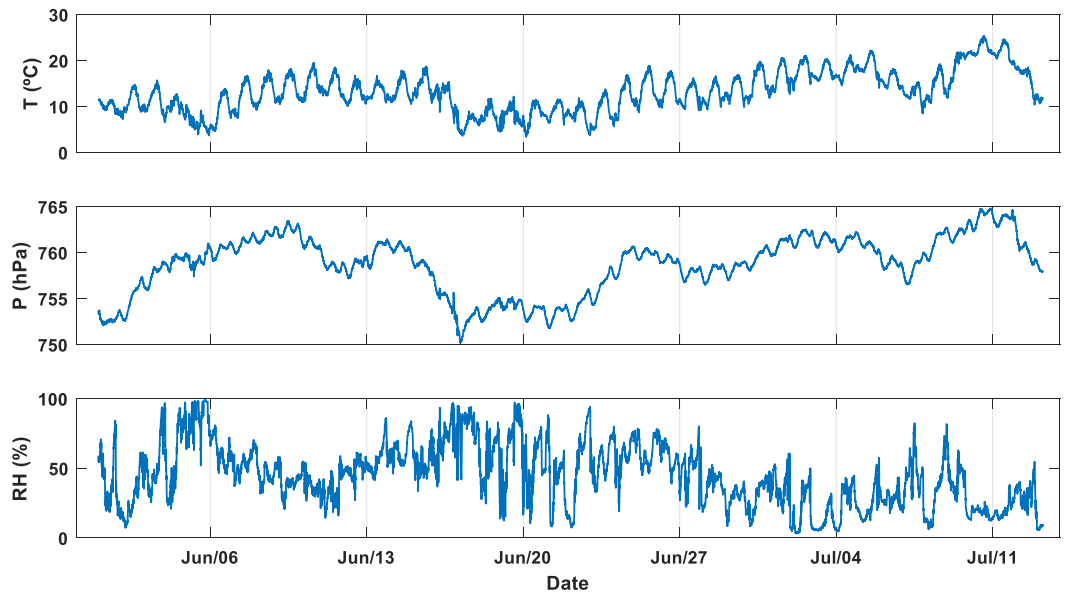

Figure S1. Time-series of temperature (T), pressure (P) and relative humidity (RH) along the campaign.

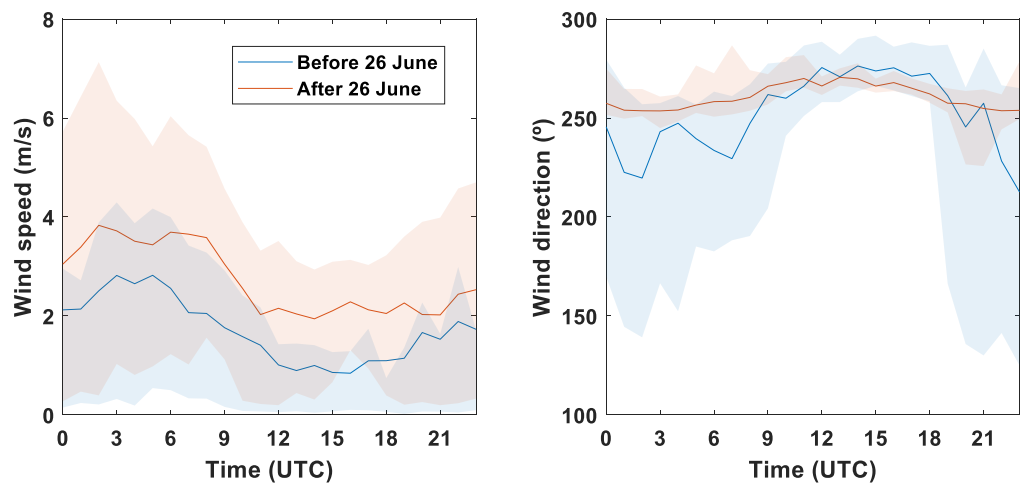

Figure S2. Mean diurnal pattern of the wind speed (left panel) and direction (right panel) during the whole campaign, before and after 26<sup>th</sup> June. The shaded area represents the interquartile range for each variable.

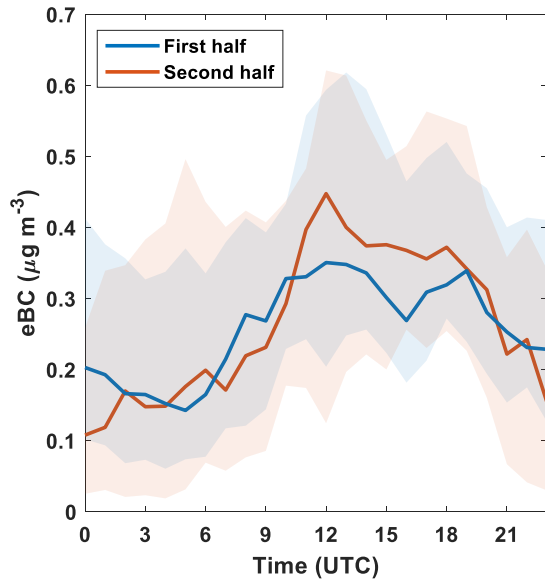

Figure S3. Mean diurnal evolution of of eBC mass concentration during the first and second half of the campaign. The black dash line represents the sampling station height. The shaded area is limited by the percentile 25<sup>th</sup> and 75 of the corresponding data.

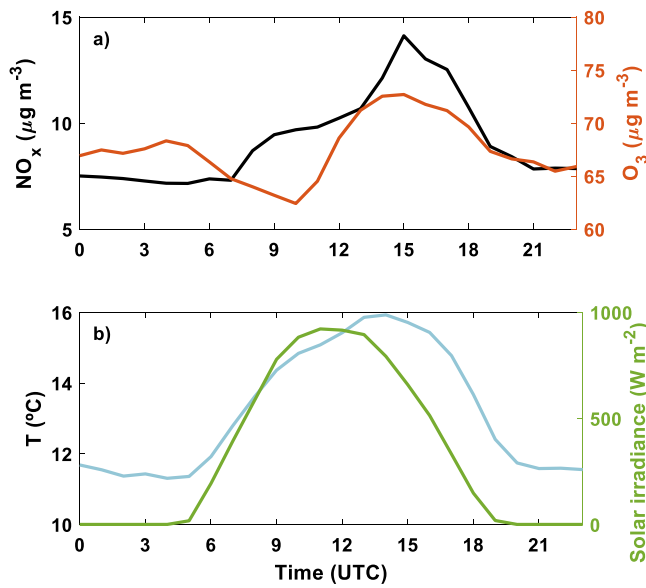

Figure S4. Mean diurnal evolution of a) NO<sub>x</sub> (left Y axis) and O<sub>3</sub> concentration (right Y axis) and b) temperature (left Y axis) and solar global irradiance (right Y axis) along the campaign.

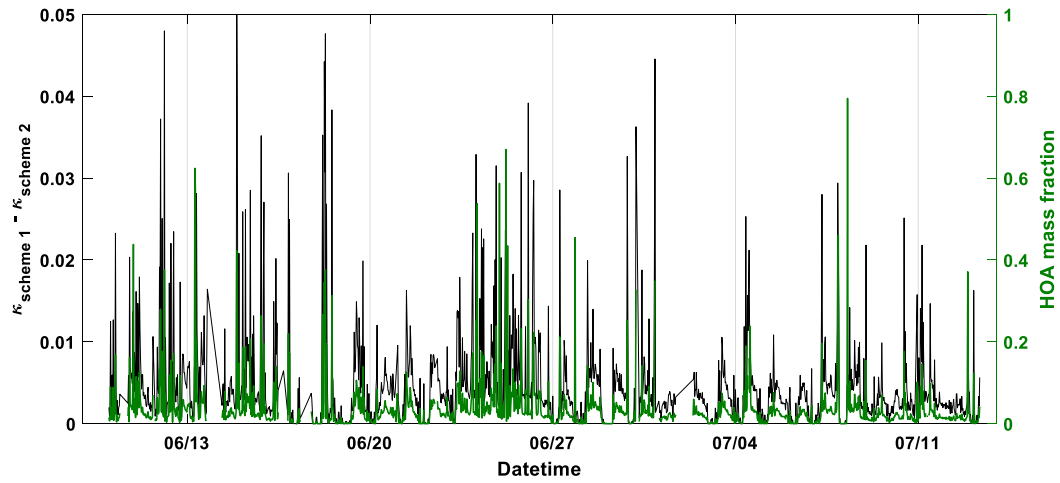

Figure S5. Time series along the field campaign of hygroscopicity parameter difference between both schemes (left Y-axis) and HOA mass fraction (right Y-axis).

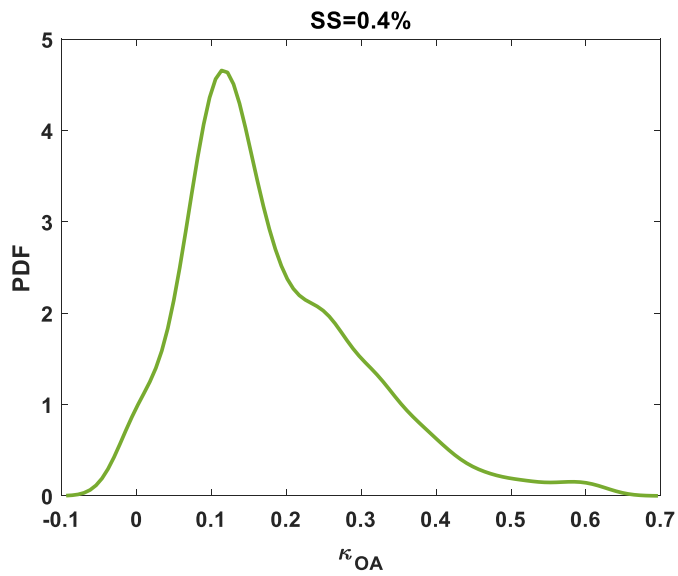

Figure S6. Probability density function (PDF) plot of  $\kappa_{\text{OA}}$  at SS=0.4%.
